# Supplementary material
Source: Springer Nature journal article supplement (https://www.springermedizin.de/resource/supplementary/12889_2010_2698_MOESM3_ESM.pdf/9487130)

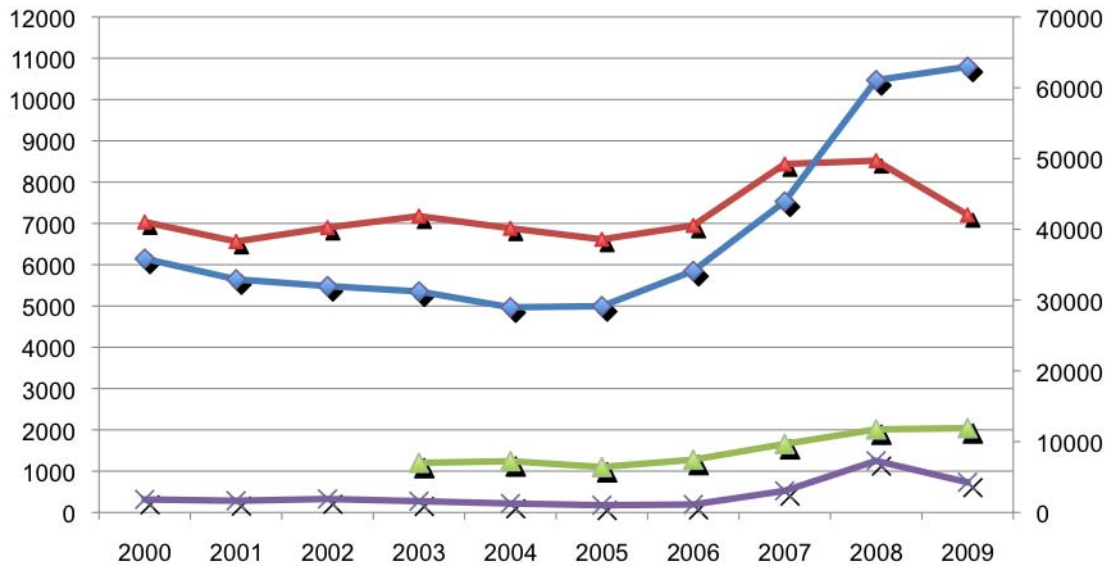

▲ Total admissions      ▲ Total babies delivered  
× Total major operations      ◆ OPD attendance

Supplement: MOESM3 [file 9487130]
